# Supplementary material
Source: PubMed Central journal article supplement (PMC3869871)

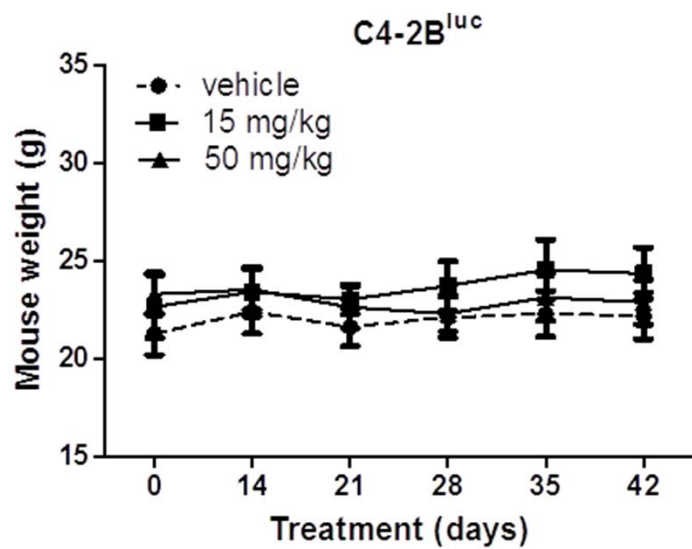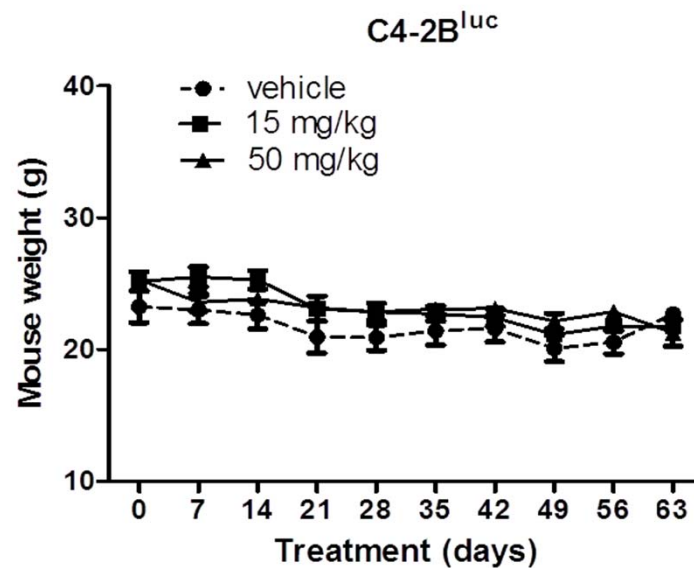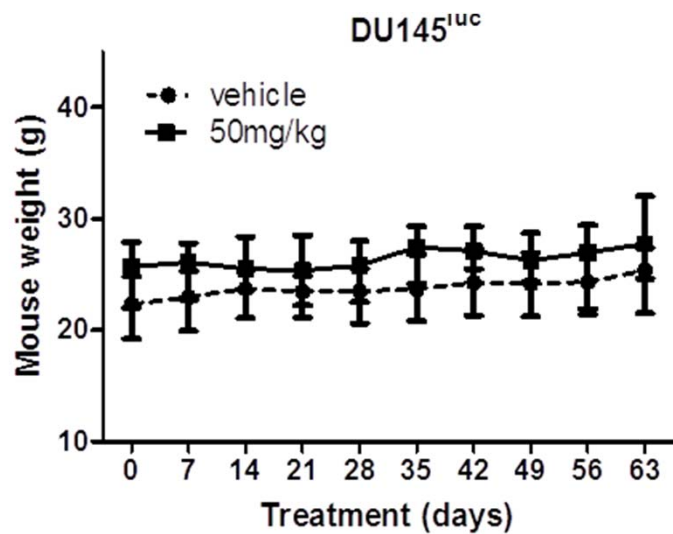

**Intratribial injection**

**SQ injection**

**Figure S1**

Supplement: NIHMS528783-supplement-2.pdf [file NIHMS528783-supplement-2.pdf]

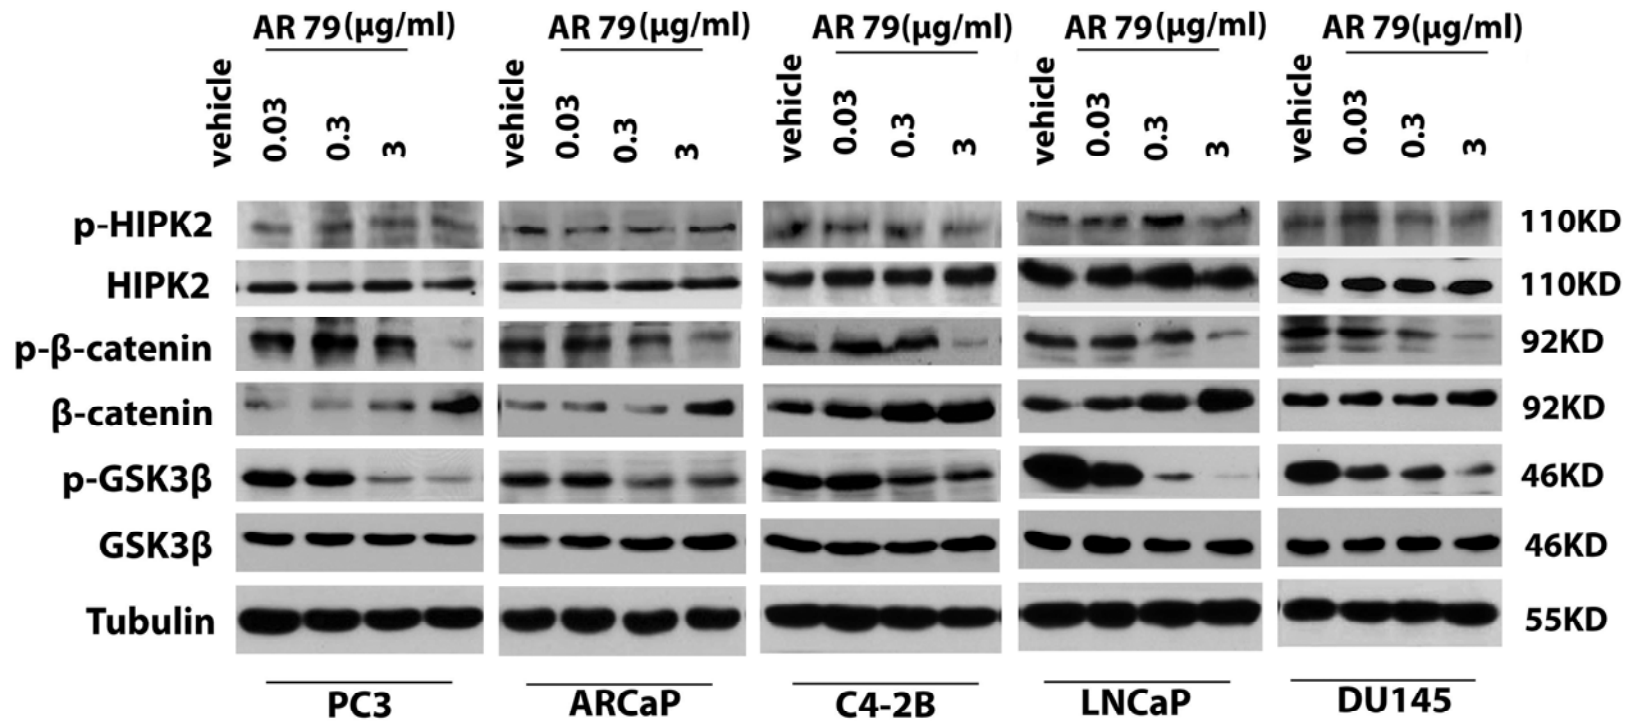

**Figure S2**

Supplement: NIHMS528783-supplement-3.pdf [file NIHMS528783-supplement-3.pdf]

**A**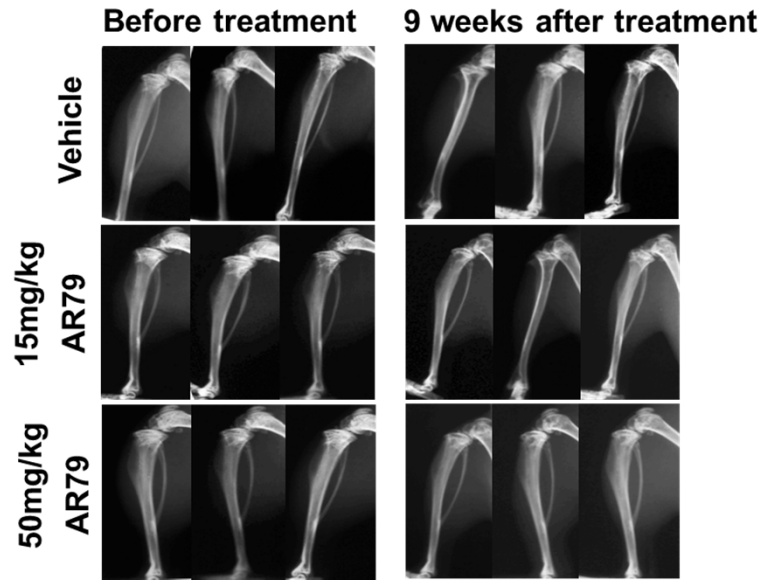**B**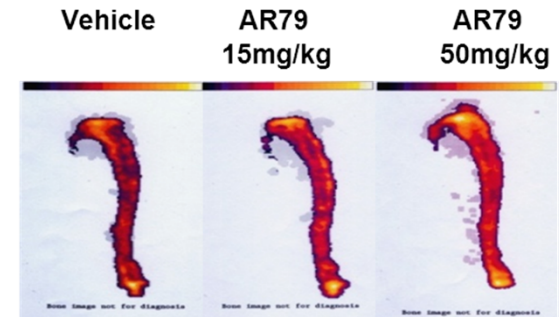**C**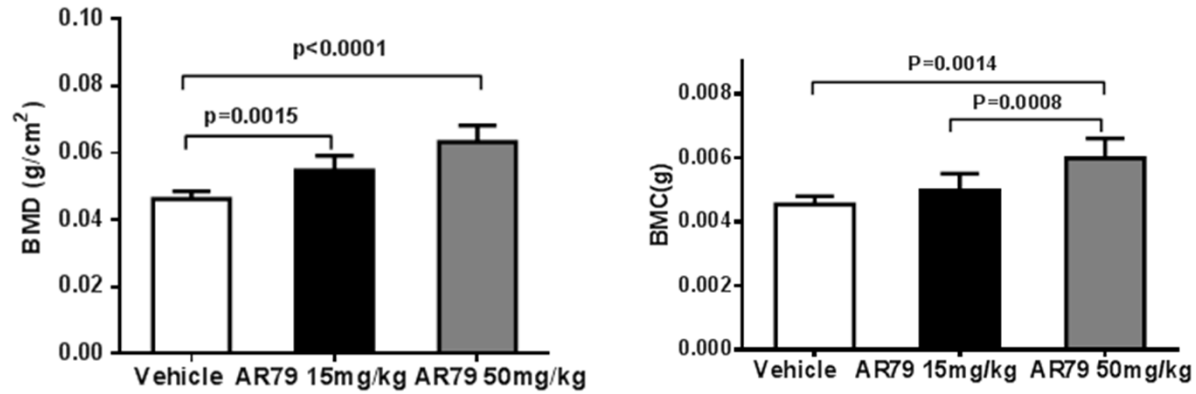**Figure S3**

Supplement: NIHMS528783-supplement-4.pdf [file NIHMS528783-supplement-4.pdf]

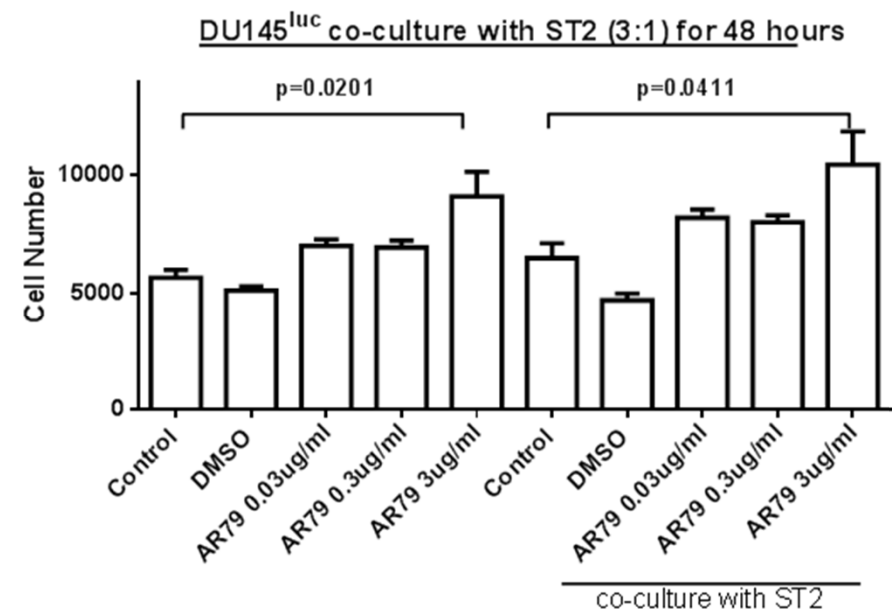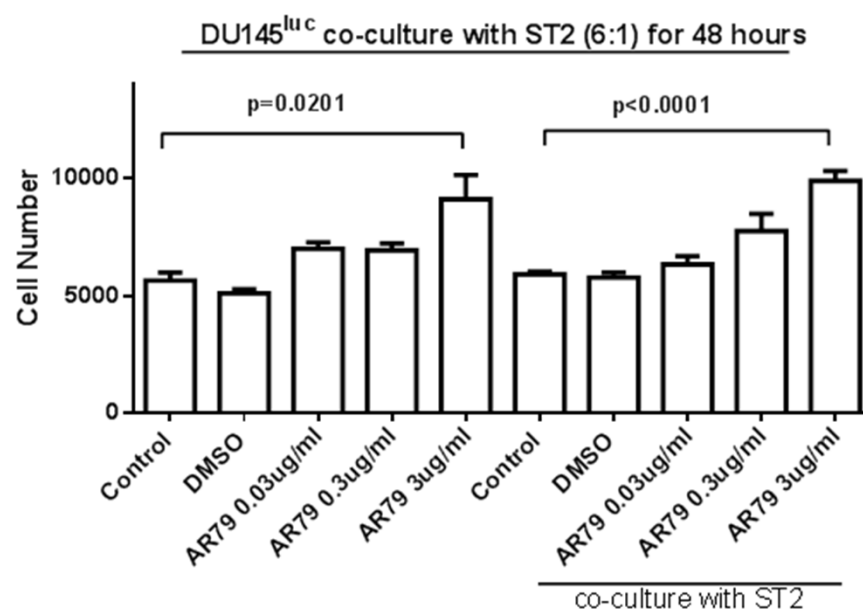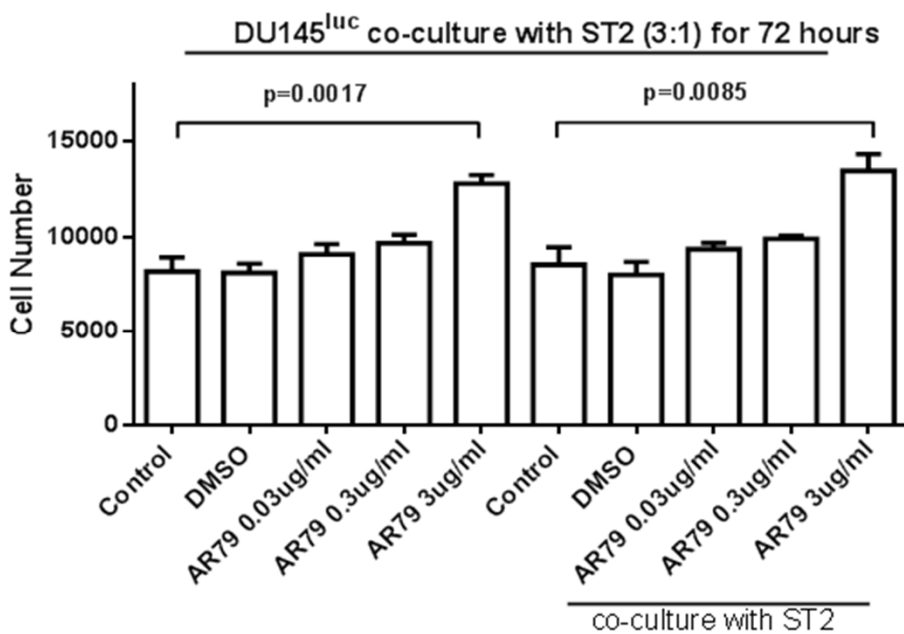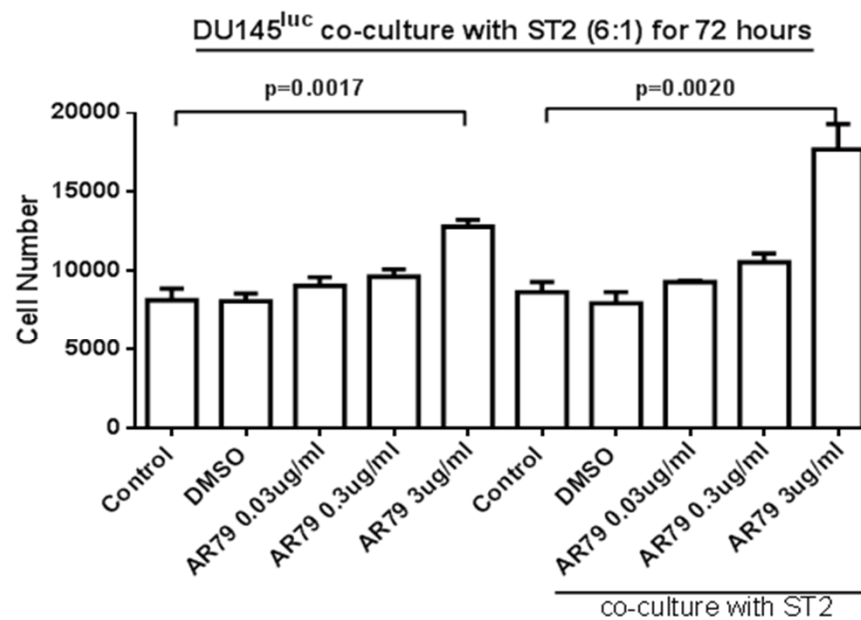

**Figure S4**

Supplement: NIHMS528783-supplement-5.pdf [file NIHMS528783-supplement-5.pdf]

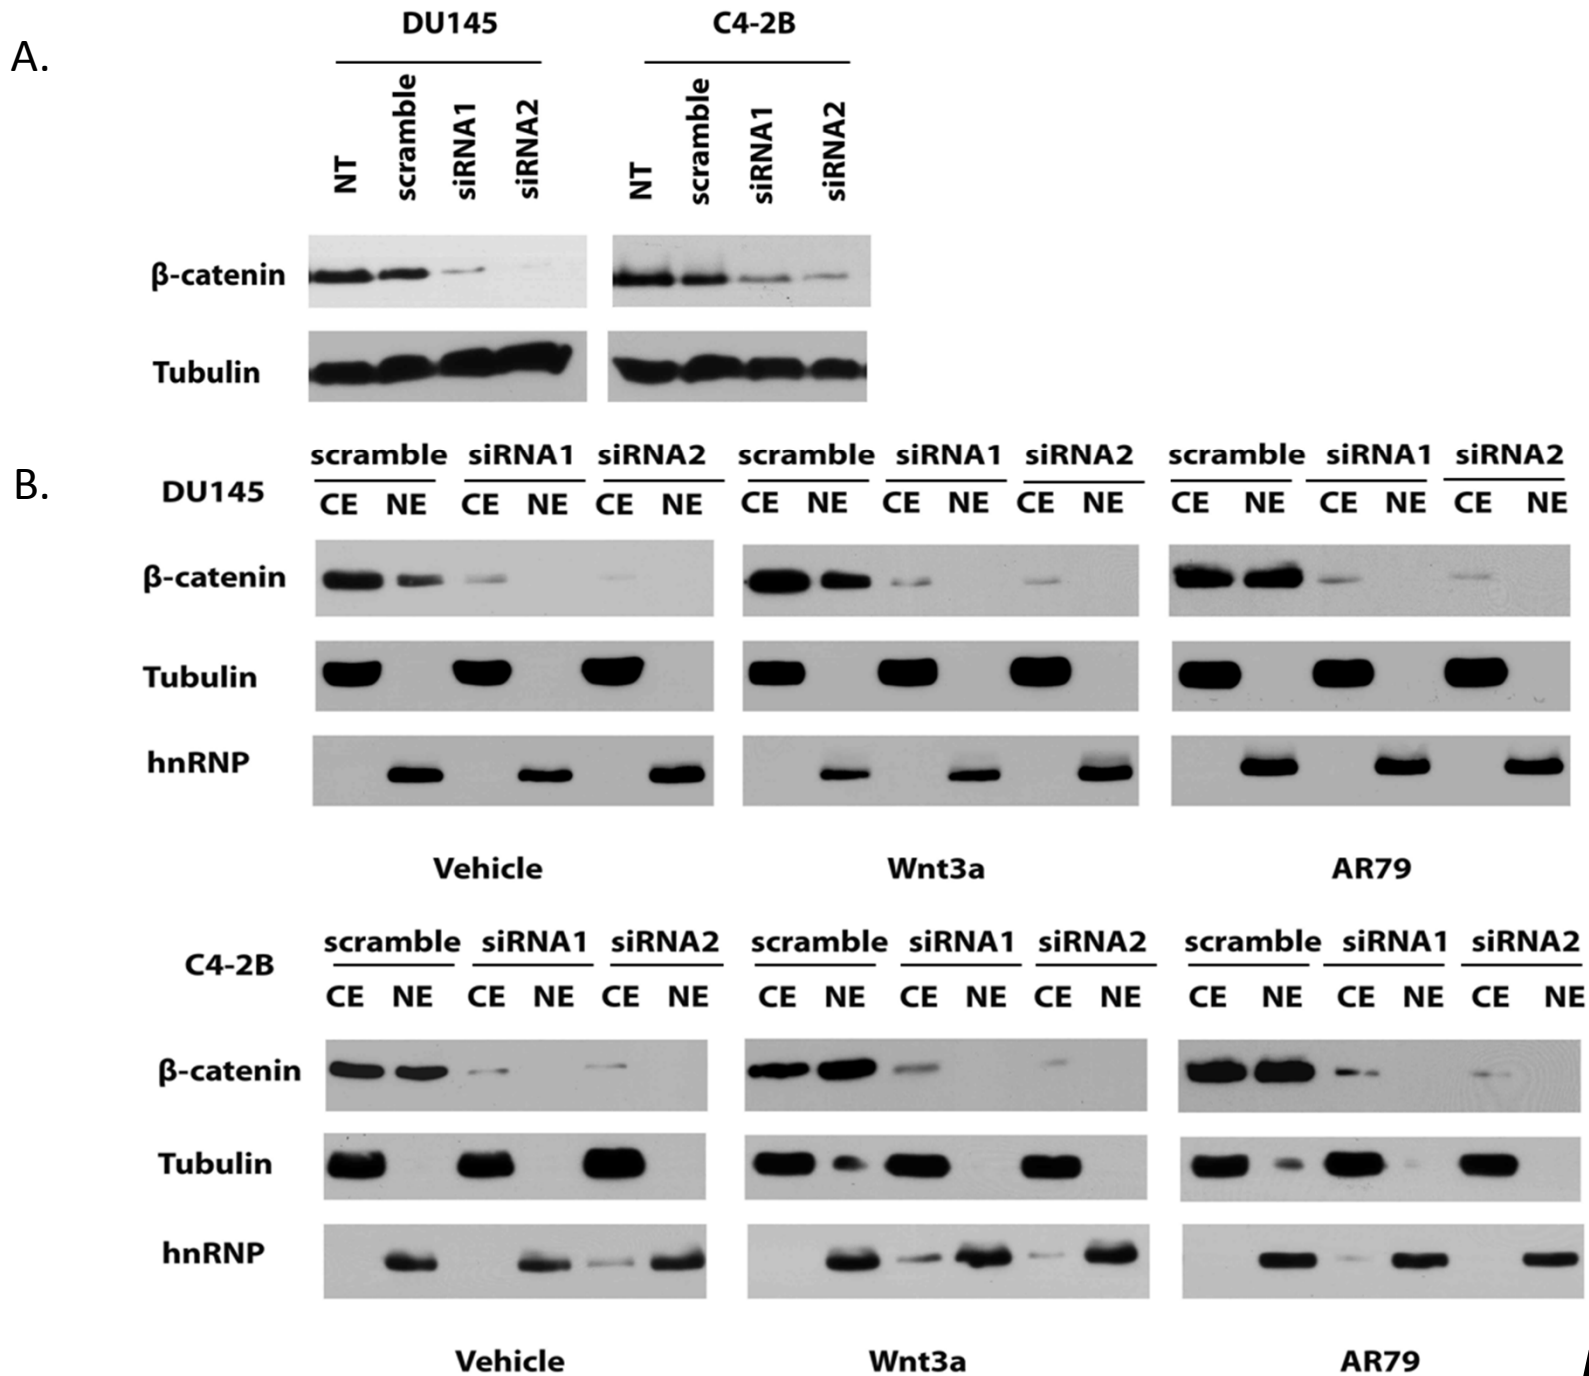

**Figure S5**

Supplement: NIHMS528783-supplement-6.pdf [file NIHMS528783-supplement-6.pdf]
